# Supplementary material for: Photo-Fries rearrangements of 1-naphthyl esters in the glassy and melted states of poly(vinyl acetate). Comparisons with reactions in less polar polymers and low-viscosity solvents
Source: Royal Society of Chemistry journal article supplement (doi:10.1039/b107011h), 2002-01-01
Supplement: b107011h.pdf [file b107011h.pdf]

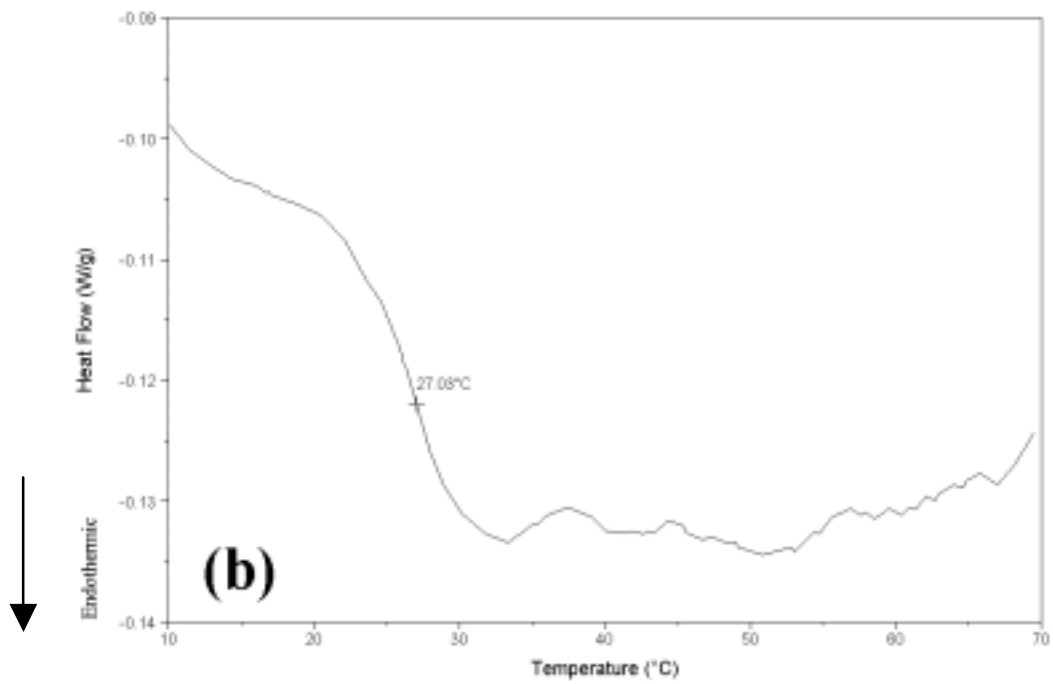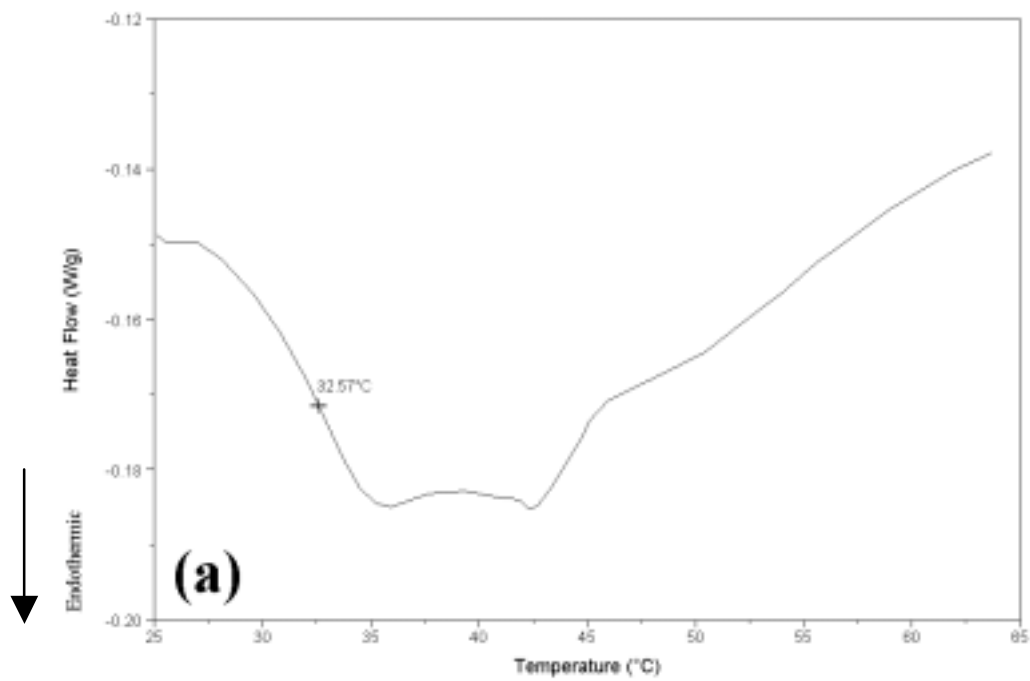

Supplementary Figure 1. DSC heating thermograms showing glass transition temperatures (+): (a) **PVAc-140**; (b) **PVAc-83**.
